# Supplementary material for: Young People’s Attitudes and Motivations Toward Social Media and Mobile Apps for Weight Control: Mixed Methods Study
Source: PubMed Central journal article supplement (PMC6913715; doi:10.2196/11205), 2019-10-10
Supplement: mhealth_v7i10e11205_app1.pdf [file mhealth_v7i10e11205_app1.pdf]

- We are a team of university researchers who want to help young people avoid unwanted weight gain.
- We would like your help with this.
- We have no connections to any related commercial company or products.

1. Do you live in

- Finland
- Singapore
- Greece
- Belgium
- UK
- New Zealand

2. Are you

- Male
- Female

3. What is your age?

4. Are you currently?

- In school
- In higher education (college, university, polytechnic)
- Employed-part time
- Employed-Full time
- Looking for a job

5. Does any of your parents have a University degree?

- Yes
- No

6. Does any of your parents smoke?

Yes

No

7. Do you currently smoke cigarettes, or not?

Yes, I do

No, I do not

8. What is your postcode?

9. Are you concerned about weight-gain for yourself or your friends?

Yes

No

10. Would you be interested in a quiz showing how likely you are to gain unwanted weight in the 5-10 years?

Yes

No

Other (please specify)

11. Do you use any mobile apps on food/diet or physical activity?

Yes

No

12. What mobile apps related to food/diet or physical activity do you use?

13. Would you be interested in an app on food/exercise developed specifically for your age group with scientific information provided by a team of researchers?

- Yes
- No
- Not sure

Other (please specify)

14. What is your current weight?

15. What is your height?

16. What is your waist size?

17. What is your dress size?

18. Can we contact you to clarify any of the answers above?  
Please provide us with your email address.
